# Supplementary material for: Taxonomic revision and molecular phylogenetics of the Idarnes incertus species-group (Hymenoptera, Agaonidae, Sycophaginae)
Source: PeerJ. 2017 Jan 5;5:e2842. doi: 10.7717/peerj.2842 (PMC5289451; doi:10.7717/peerj.2842)
Supplement: Supplemental Information 2 — Sampling information and GenBank assession numbers for Idarnes incertus sp. gp species and outgroups [file peerj-05-2842-s002.xlsx]

## Sheet: Sheet2
Supplementary Material 2: Sampling information and GenBank assession numbers for Idarnes incertus sp. gp species and outgroups
Voucher	Species	Host	Locality	Collector	COI	Cytb	EF1a	28S
JRAS02355_0501	Odontofroggatia ishii Wiebes, 1980	Ficus microcarpa	Indonesia, Tanahaubuh river	Cruaud A & Rasplus JY	HM770634	HM770588	HM770537	HM770696
JRAS02355_0302	Odontofroggatia sp.	Ficus microcarpa	Indonesia, Tanahaubuh river	Cruaud A & Rasplus JY	HM770633	HM770587	HM770536	KY210146
JRAS01360_0503	Sycophaga agraensis (Joseph, 1953)	Ficus racemosa	India, Bangalore, Campus University	Proffit M	HM770659	HM770559	HM770503	HM770664
JRAS02085_0201	Conidarnes sumatranae Farache & Rasplus, 2015	Ficus sumatrana	Indonesia, Pattunuang	Rasplus JY	HM770620	HM770576	HM770522	HM770682
JRAS02586_0201	Anidarnes dissidens Farache & Rasplus, 2013	Ficus obtusifolia	Brazil, Galia	Pereira RAS	JQ925920	JQ925902	JQ925887	JQ925932
JRAS02558_0101	Pseudidarnes cooki Farache & Rasplus, 2014	Ficus obliqua	Australia	Cook J	HM770642	HM770596	HM770545	HM770704
JRAS02560_0295	Idarnes sp. 2 (carme sp gp)	Ficus citrifolia	Brazil, Ribeirao Preto	Pereira RAS	JN001574	JN001638	JN001710	JN001505
JRAS02588_0295	Idarnes flavicollis (Mayr, 1885) (flavicollis sp gp)	Ficus luschnathiana	Brazil, Galia	Pereira RAS	KY210168	KY210184	KY210197	KY210147
JRAS02824_0302	Idarnes flaviventris Farache & Rasplus, sp. n.	Ficus aurea form isophlebia	Costa Rica, Puerto Viejo de Talamanca	Cruaud A & Rasplus JY	–	KY210185	KY210198	KY210148
JRAS05521_0101	Idarnes amazonicus Farache & Rasplus, sp. n.	Ficus americana form mathewsii	Brazil, Manaus	Santos OA	KY210169	–	KY210199	KY210149
JRAS02812_0201	Idarnes gordhi Farache & Rasplus, sp. n.	Ficus popenoei	Costa Rica, Guapiles	Cruaud A & Rasplus JY	KY210170	KY210186	KY210200	KY210150
JRAS02812_0202	Idarnes gordhi Farache & Rasplus, sp. n.	Ficus popenoei	Costa Rica, Guapiles	Cruaud A & Rasplus JY	–	KY210187	KY210201	KY210151
JRAS01954_0201	Idarnes brevis Farache & Rasplus, sp. n.	Ficus citrifolia	Costa Rica, Puriscal, Santiago	Fernandez M	KY210171	–	KY210202	KY210152
JRAS01954_0202	Idarnes brevis Farache & Rasplus, sp. n.	Ficus citrifolia	Costa Rica, Puriscal, Santiago	Fernandez M	KY210172	–	KY210203	KY210153
JRAS02284_0201	Idarnes brevis Farache & Rasplus, sp. n.	Ficus citrifolia	Costa Rica, Estacion Fabio Braudi	Rasplus JY & Ramirez W	JN001559	–	JN001696	JN001503
JRAS02284_0202	Idarnes brevis Farache & Rasplus, sp. n.	Ficus citrifolia	Costa Rica, Estacion Fabio Braudi	Rasplus JY & Ramirez W	JN001560	JN001626	JN001697	KY210154
JRAS01958_0201	Idarnes brunneus Farache & Rasplus, sp. n.	Ficus colubrinae	Costa Rica, OTS, La Selva	Hanson P	KY210173	KY210188	KY210204	KY210155
JRAS02861_0201	Idarnes comptoni Farache & Rasplus, sp. n.	Ficus hartwegii	Costa Rica, 8km N Ciudad Neily	Cruaud A & Rasplus JY	KY210174	KY210189	KY210205	KY210156
JRAS02136_0201	Idarnes dimorphicus Farache & Rasplus, sp. n.	Ficus citrifolia	Brazil, Manaus, Ponta Negra	Santos, OA	KY210175	KY210190	KY210206	KY210157
JRAS02136_0202	Idarnes dimorphicus Farache & Rasplus, sp. n.	Ficus citrifolia	Brazil, Manaus, Ponta Negra	Santos, OA	KY210176	KY210191	KY210207	KY210158
JRAS02562_0201	Idarnes dimorphicus Farache & Rasplus, sp. n.	Ficus citrifolia	Brazil, Ribeirao Preto	Pereira RAS	KY210177	–	JN001711	KY210159
JRAS02562_0202	Idarnes dimorphicus Farache & Rasplus, sp. n.	Ficus citrifolia	Brazil, Ribeirao Preto	Pereira RAS	HM770643	–	HM770546	HM770705
JRAS01682_0201	Idarnes gibberosus Farache & Rasplus, sp. n.	Ficus americana subsp. andicola	Colombia, Bogota	Jansen S	KY210178	KY210192	KY210208	KY210160
JRAS02871_0401	Idarnes incertus (Ashmead, 1900)	Ficus aurea	USA, Florida City	Cruaud A & Rasplus JY	KY210179	–	–	KY210161
JRAS02871_0402	Idarnes incertus (Ashmead, 1900)	Ficus aurea	USA, Florida City	Cruaud A & Rasplus JY	KY210180	–	KY210209	KY210162
JRAS02583_0295	Idarnes maximus Farache & Rasplus, sp. n.	Ficus obtusifolia	Brazil, Galia	Pereira RAS	KY210181	KY210193	KY210210	KY210163
JRAS02824_0401	Idarnes nigriventris Farache & Rasplus, sp. n.	Ficus aurea form isophlebia	Costa Rica, Puerto Viejo de Talamanca	Cruaud A & Rasplus JY	–	KY210194	KY210211	KY210164
JRAS02824_0402	Idarnes nigriventris Farache & Rasplus, sp. n.	Ficus aurea form isophlebia	Costa Rica, Puerto Viejo de Talamanca	Cruaud A & Rasplus JY	KY210182	KY210195	KY210212	KY210164
JRAS02182_0201	Idarnes pseudoflavus Farache & Rasplus, sp. n.	Ficus crocata	Costa Rica, Perez Seladon	Rasplus JY	HM770626	HM770580	HM770528	HM770688
JRAS02182_0202	Idarnes pseudoflavus Farache & Rasplus, sp. n.	Ficus crocata	Costa Rica, Perez Seladon	Rasplus JY	JN001552	JN001619	JN001689	KY210165
JRAS02182_0203	Idarnes pseudoflavus Farache & Rasplus, sp. n.	Ficus crocata	Costa Rica, Perez Seladon	Rasplus JY	KY210183	KY210196	KY210213	KY210166
JRAS02177_0301	Idarnes ramirezi Farache & Rasplus, sp. n.	Ficus americana subsp. americana	Costa Rica, Pequena Helvetia	Rasplus JY & Ramirez W	HM770625	HM770579	HM770527	HM770687
JRAS02177_0302	Idarnes ramirezi Farache & Rasplus, sp. n.	Ficus americana subsp. americana	Costa Rica, Pequena Helvetia	Rasplus JY & Ramirez W	JN001549	JN001616	JN001686	KY210167

## Sheet: Sheet1
Supplementary Material 1: Sampling information and GenBank assession numbers for Idarnes incertus sp. gp species and outgroups
Obs: Genbank assession files will be provided before publication
Specimen	Species	Host	Locality	Collector	28S	COI	Cytb	EF
JRAS02355_0501	Odontofroggatia ishii Wiebes, 1980	Ficus microcarpa	Indonesia, Tanahaubuh river	Cruaud A & Rasplus JY	JRAS02355_0501_57275_PUB	JRAS02355_0501_57174_PUB	JRAS02355_0501_57032_PUB	JRAS02355_0501_56900_PUB
JRAS02355_0302	Odontofroggatia sp.	Ficus microcarpa	Indonesia, Tanahaubuh river	Cruaud A & Rasplus JY	JRAS02355_0302_31931_COK	JRAS02355_0302_57173_PUB	JRAS02355_0302_57031_PUB	JRAS02355_0302_56899_PUB
JRAS01360_0503	Sycophaga agraensis (Joseph, 1953)	Ficus racemosa	India, Bengalore, Campus University	Proffit M	JRAS01360_0503_57225_PUB	JRAS01360_0503_57083_PUB	JRAS01360_0503_56954_PUB	JRAS01360_0503_56808_PUB
JRAS02085_0201	Conidarnes sumatranae Farache & Rasplus, 2015	Ficus sumatrana	Indonesia, Pattunuang	Rasplus JY	JRAS02085_0201_57250_PUB	JRAS02085_0201_52568_POK	JRAS02085_0201_56994_PUB	JRAS02085_0201_56852_PUB
JRAS02586_0201	Anidarnes dissidens Farache & Rasplus, 2013	Ficus obtusifolia	Brazil, Galia	Pereira RAS	JRAS02586_0201_52715_POK	JRAS02586_0201_50356_POK	JRAS02586_0201_57066_PUB	JRAS02586_0201_56941_PUB
JRAS02558_0101	Pseudidarnes cooki Farache & Rasplus, 2014	Ficus obliqua	Australia	Cook J	JRAS02558_0101_57284_PUB	JRAS02558_0101_52591_POK	JRAS02558_0101_57047_PUB	JRAS02558_0101_56916_PUB
JRAS02560_0295	Idarnes sp. 2 (carme gp)	Ficus citrifolia	Brazil, Ribeirao Preto	Pereira RAS	JRAS02560_0295_57285_PUB	JRAS02560_0295_57193_PUB	JRAS02560_0295_57048_PUB	JRAS02560_0295_56917_PUB
JRAS02588_0295	Idarnes flavicollis (Mayr, 1885)	Ficus luschnathiana	Brazil, Galia	Pereira RAS	JRAS02588_0295_48046_attente	JRAS02588_0295_50527_POK	JRAS02588_0295_48841_POK	JRAS02588_0295_49486_POK
JRAS01958_0201	Idarnes brunneus Farache & Rasplus, sp. n.	Ficus colubrinae	Costa Rica, OTS, La Selva	Hanson P	JRAS01958_0201_XXXXX_COK	JRAS01958_0201_57329_COK	JRAS01958_0201_55794_COK	JRAS01958_0201_55852_COK
JRAS02861_0201	Idarnes comptoni Farache & Rasplus, sp. n.	Ficus hartwegii	Costa Rica, 8km N Ciudad Neily	Cruaud A & Rasplus JY	JRAS02861_0201_53261_COK	JRAS02861_0201_53265_COK	JRAS02861_0201_53266_COK	JRAS02861_0201_53267_COK
JRAS02177_0302	Idarnes williamsi Farache & Rasplus, sp. n.	Ficus americana subsp. americana	Costa Rica, Pequena Helvetia	Rasplus JY & Ramirez W	JRAS02177_0302_XXXXX_COK	JRAS02177_0302_57148_PUB	JRAS02177_0302_57007_PUB	JRAS02177_0302_56873_PUB
JRAS02177_0301	Idarnes williamsi Farache & Rasplus, sp. n.	Ficus americana subsp. americana	Costa Rica, Pequena Helvetia	Rasplus JY & Ramirez W	JRAS02177_0301_57261_PUB	JRAS02177_0301_57147_PUB	JRAS02177_0301_57006_PUB	JRAS02177_0301_56872_PUB
JRAS05521_0101	Idarnes amazonicus Farache & Rasplus, sp. n.	Ficus americana form mathewsii	Brazil, Manaus	Santos OA	JRAS05521_0102_XXXXX_COK	JRAS05521_0101_61779_COK	NA	JRAS05521_0101_56265_COK
JRAS02812_0201	Idarnes aureonigrus Farache & Rasplus, sp. n.	Ficus popenoei	Costa Rica, Guapiles	Cruaud A & Rasplus JY	JRAS02812_0201_XXXXX_COK	JRAS02812_0201_60494_COK	JRAS02812_0201_61040_COK	JRAS02812_0201_60246_COK
JRAS02812_0202	Idarnes aureonigrus Farache & Rasplus, sp. n.	Ficus popenoei	Costa Rica, Guapiles	Cruaud A & Rasplus JY	JRAS02812_0202_XXXXX_COK	NA	JRAS02812_0202_61121_COK	JRAS02812_0202_60247_COK
JRAS01682_0201	Idarnes gibberosus Farache & Rasplus, sp. n.	Ficus americana subsp. andicola	Colombia, Bogota	Jansen S	JRAS01682_0201_45763_COK	JRAS01682_0201_50371_POK	JRAS01682_0201_44017_POK	JRAS01682_0201_43924_POK
JRAS02824_0401	Idarnes nigriventris Farache & Rasplus, sp. n.	Ficus aurea form isophlebia	Costa Rica, Puerto Viejo de Talamanca	Cruaud A & Rasplus JY	JRAS02824_0401_XXXXX_COK	NA	JRAS02824_0401_61039_COK	JRAS02824_0401_60249_COK
JRAS02583_0295	Idarnes maximus Farache & Rasplus, sp. n.	Ficus obtusifolia	Brazil, Galia	Pereira RAS	JRAS02583_0295_XXXXX_attentePF	JRAS02583_0295_50520_POK	JRAS02583_0295_48859_POK	JRAS02583_0295_49527_POK
JRAS01954_0201	Idarnes brevis Farache & Rasplus, sp. n.	Ficus citrifolia	Costa Rica, Puriscal, Santiago	Fernandez M	JRAS01954_0201_XXXXX_COK	JRAS01954_0201_50396_POK	NA	JRAS01954_0201_38744_POK
JRAS02284_0201	Idarnes brevis Farache & Rasplus, sp. n.	Ficus citrifolia	Costa Rica, Estacion Fabio Braudi	Rasplus JY & Ramirez W	JRAS02284_0201_57269_PUB	JRAS02284_0201_57163_PUB	NA	JRAS02284_0201_56889_PUB
JRAS02284_0202	Idarnes brevis Farache & Rasplus, sp. n.	Ficus citrifolia	Costa Rica, Estacion Fabio Braudi	Rasplus JY & Ramirez W	JRAS02284_0202_29598_COK	JRAS02284_0202_57164_PUB	JRAS02284_0202_57022_PUB	JRAS02284_0202_56890_PUB
JRAS01954_0202	Idarnes brevis Farache & Rasplus, sp. n.	Ficus citrifolia	Costa Rica, Puriscal, Santiago	Fernandez M	JRAS01954_0202_XXXXX_COK	JRAS01954_0202_50397_POK	NA	JRAS01954_0202_38745_POK
JRAS02182_0201	Idarnes pseudoflavus Farache & Rasplus, sp. n.	Ficus crocata	Costa Rica, Perez Seladon	Rasplus JY	JRAS02182_0201_57264_PUB	JRAS02182_0201_57153_PUB	JRAS02182_0201_57012_PUB	JRAS02182_0201_56878_PUB
JRAS02182_0202	Idarnes pseudoflavus Farache & Rasplus, sp. n.	Ficus crocata	Costa Rica, Perez Seladon	Rasplus JY	JRAS02182_0202_XXXXX_COK	JRAS02182_0202_57154_PUB	JRAS02182_0202_57013_PUB	JRAS02182_0202_56879_PUB
JRAS02182_0203	Idarnes pseudoflavus Farache & Rasplus, sp. n.	Ficus crocata	Costa Rica, Perez Seladon	Rasplus JY	JRAS02182_0203_XXXXX_COK	JRAS02182_0203_50473_POK	JRAS02182_0203_41658_POK	JRAS02182_0203_37737_POK
JRAS02136_0202	Idarnes dimorphicus Farache & Rasplus, sp. n.	Ficus citrifolia	Brazil, Manaus, Ponta Negra	Santos, OA	JRAS02136_0202_XXXXX_COK	JRAS02136_0202_50425_POK	JRAS02136_0202_28032_POK	JRAS02136_0202_38779_POK
JRAS02136_0201	Idarnes dimorphicus Farache & Rasplus, sp. n.	Ficus citrifolia	Brazil, Manaus, Ponta Negra	Santos, OA	JRAS02136_0201_XXXXX_COK	JRAS02136_0201_50424_POK	JRAS02136_0201_28031_POK	JRAS02136_0201_38778_POK
JRAS02871_0401	Idarnes incertus (Ashmead, 1900)	Ficus aurea	USA, Florida City	Cruaud A & Rasplus JY	JRAS02871_0401_54071_COK	JRAS02871_0401_60685_COK	NA	NA
JRAS02871_0402	Idarnes incertus (Ashmead, 1900)	Ficus aurea	USA, Florida City	Cruaud A & Rasplus JY	JRAS02871_0402_XXXXX_COK	JRAS02871_0402_60686_COK	NA	JRAS02871_0402_54074_COK
JRAS02824_0302	Idarnes albiventris Farache & Rasplus, sp. n.	Ficus aurea form isophlebia	Costa Rica, Puerto Viejo de Talamanca	Cruaud A & Rasplus JY	JRAS02824_0302_XXXXX_COK	NA	JRAS02824_0302_60892_COK	JRAS02824_0302_60248_COK
JRAS02824_0402	Idarnes nigriventris Farache & Rasplus, sp. n.	Ficus aurea form isophlebia	Costa Rica, Puerto Viejo de Talamanca	Cruaud A & Rasplus JY	JRAS02824_0401_XXXXX_COK	JRAS02824_0402_60600_COK	JRAS02824_0402_60893_COK	JRAS02824_0402_60321_COK
JRAS02562_0202	Idarnes dimorphicus Farache & Rasplus, sp. n.	Ficus citrifolia	Brazil, Ribeirao Preto	Pereira RAS	JRAS02562_0202_57286_PUB	JRAS02562_0202_57195_PUB	NA	JRAS02562_0202_56919_PUB
JRAS02562_0201	Idarnes dimorphicus Farache & Rasplus, sp. n.	Ficus citrifolia	Brazil, Ribeirao Preto	Pereira RAS	JRAS02562_0201_52705_POK	JRAS02562_0201_52592_POK	NA	JRAS02562_0201_56918_PUB
