# Supplementary material for: Taxonomic revision and molecular phylogenetics of the Idarnes incertus species-group (Hymenoptera, Agaonidae, Sycophaginae)
Source: PeerJ. 2017 Jan 5;5:e2842. doi: 10.7717/peerj.2842 (PMC5289451; doi:10.7717/peerj.2842)
Supplement: Supplemental Information 4 — Measurements for Idarnes incertus sp. g. species in mm [file peerj-05-2842-s004.xlsx]

## Sheet: I._incertus_measurements
Supplementary material: Measurements for Idarnes incertus sp. g. species in mm
Species	specimen	gender	head length	mesosoma length	metasoma length	Body length	Ovipositor sheaths length	hind tibia length	head width	head height	Distance torulus - median ocellus	distance from torulus to oral margin	POL	OOL	scape length	pedicel length	F1 length	F1 width	mesoscutellum length	mesoscutellum width	wing length	marginal vein	stigmal vein	postmarginal vein
Idarnes amacayacuensis Farache & Rasplus, sp. n.	AMM01	Female	0.235	0.559	0.72	1.514	0.479	0.3	0.461	0.365	0.145	0.11	0.132	0.044	0.135	0.07	0.036	0.048	0.19	0.159	1.168	0.117	0.107	0.033
Idarnes amacayacuensis Farache & Rasplus, sp. n.	AMM02	Male	0.236	0.641	0.494	1.371	X	0.304	0.418	0.332	0.138	0.091	0.101	0.043	0.132	0.064	0.022	0.042	0.16	0.117	1.086	0.108	0.104	0.034
Idarnes amazonicus Farache & Rasplus, sp. n.	2147_03M01	Female	0.22	0.571	0.652	1.443	0.42	0.32	0.409	0.332	0.123	0.118	0.129	0.052	0.115	0.05	0.03	0.055	0.205	0.145	1.094	0.125	0.089	0.032
Idarnes americanae Farache & Rasplus, sp. n.	2841_01M01	Female	0.303	0.872	0.867	2.042	0.549	0.481	0.392	0.303	0.177	0.147	0.202	0.06	0.175	0.076	0.055	0.074	0.239	0.185	1.612	0.13	0.125	0.034
Idarnes americanae Farache & Rasplus, sp. n.	2841_01M02	Male	0.293	0.748	0.855	1.896	X	0.413	0.492	0.436	0.179	0.12	0.139	0.045	0.184	0.078	0.025	0.049	0.2	0.146	1.451	0.126	0.13	0.046
Idarnes badiovertex Farache & Rasplus, sp. n.	BAM01	Female	0.225	0.5	0.628	1.353	0.5	0.273	0.393	0.321	0.133	0.095	0.127	0.042	0.105	0.058	0.023	0.045	0.155	0.114	0.967	0.1	0.093	0.02
Idarnes brevis Farache & Rasplus, sp. n.	3857M01	Female	0.304	0.891	0.935	2.13	0.4	0.481	0.647	0.484	0.17	0.18	0.21	0.068	0.179	0.08	0.05	0.07	0.297	0.22	1.709	0.162	0.139	0.045
Idarnes brevis Farache & Rasplus, sp. n.	3857M02	Male	0.354	0.927	0.85	2.131	X	0.478	0.607	0.501	0.191	0.145	0.177	0.083	0.219	0.092	0.041	0.055	0.268	0.172	1.648	0.187	0.148	0.051
Idarnes brunneus Farache & Rasplus, sp. n.	2832_05M01	Female	0.246	0.544	0.649	1.439	0.488	0.335	0.462	0.355	0.123	0.139	0.145	0.05	0.139	0.066	0.033	0.047	0.185	0.148	1.188	0.101	0.095	0.029
Idarnes brunneus Farache & Rasplus, sp. n.	2832_05M02	Male	0.236	0.574	0.695	1.505	X	0.319	0.413	0.342	0.119	0.097	0.126	0.049	0.139	0.074	0.036	0.05	0.164	0.126	1.169	0.106	0.094	0.029
Idarnes comptoni Farache & Rasplus, sp. n.	2861M01	Female	0.203	0.478	0.582	1.263	0.481	0.281	0.393	0.307	0.118	0.112	0.139	0.05	0.124	0.062	0.031	0.048	0.163	0.142	1.069	0.115	0.07	0.015
Idarnes cremersiae Farache & Rasplus, sp. n.	3711_M01	Female	0.29	0.75	0.96	2	0.61	0.41	0.51	0.42	0.15	0.15	0.165	0.06	0.144	0.065	0.05	0.055	0.235	0.2	1.475	0.15	0.11	0.015
Idarnes cremersiae Farache & Rasplus, sp. n.	3711_M02	Male	0.29	0.72	0.95	1.96	X	0.4	0.5	0.43	0.152	0.135	0.12	0.07	0.165	0.078	0.039	0.043	0.2304	0.165	1.56	0.159	0.12	0.015
Idarnes dimorphicus Farache & Rasplus, sp. n.	183_5_M01	Female	0.32	0.84	0.91	2.07	0.43	0.47	0.6	0.43	0.17	0.16	0.19	0.075	0.18	0.08	0.06	0.08	0.263	0.21	1.57	0.167	0.151	0.05
Idarnes dimorphicus Farache & Rasplus, sp. n.	183_5_M02	Male	0.295	0.88	0.9	2.075	X	0.43	0.51	0.4	0.148	0.15	0.165	0.06	0.16	0.073	0.04	0.06	0.23	0.174	1.53	0.14	0.13	0.041
Idarnes flavicrus Farache & Rasplus, sp. n.	2841_1b_M01	Female	0.275	0.635	0.888	1.798	0.783	0.371	0.5	0.403	0.17	0.169	0.169	0.058	0.158	0.068	0.05	0.059	0.209	0.188	1.312	0.149	0.089	0.025
Idarnes flaviventris Farache & Rasplus, sp. n.	2824_02M01	Female	0.33	0.88	1.03	2.24	1.369	0.48	0.61	0.49	0.182	0.142	0.199	0.08	0.179	0.08	0.041	0.054	0.24	0.211	1.7	0.21	0.14	0.043
Idarnes flaviventris Farache & Rasplus, sp. n.	2824_02M02	Male	0.3	0.92	1.1	2.32	X	0.42	0.62	0.499	0.188	0.11	0.171	0.087	0.207	0.101	0.035	0.049	0.221	0.195	1.61	0.187	0.154	0.046
Idarnes gibberosus Farache & Rasplus, sp. n.	1682_02M01	Female	0.309	0.765	0.769	1.843	0.924	0.456	0.528	0.423	0.146	0.188	0.182	0.073	0.19	0.084	0.045	0.06	0.234	0.197	1.803	0.246	0.15	0.064
Idarnes gordhi Farache & Rasplus, sp. n.	2812M01	Female	0.297	0.829	0.837	1.963	1.109	0.45	0.52	0.417	0.174	0.157	0.169	0.069	0.174	0.079	0.051	0.073	0.245	0.177	1.537	0.128	0.129	0.025
Idarnes gordhi Farache & Rasplus, sp. n.	2812M02	Male	0.304	0.88	1.129	2.313	X	0.465	0.542	0.473	0.213	0.123	0.142	0.074	0.214	0.103	0.025	0.052	0.236	0.165	1.581	0.122	0.133	0.031
Idarnes hansoni Bouček, 1993	I_hansoni_BMNH_PT_Llano Bonito	Female	0.3	0.692	0.779	1.771	0.616	0.43	0.52	0.399	0.159	0.181	0.191	0.063	0.149	0.074	0.041	0.057	0.24	0.18	1.528	0.147	0.139	0.065
Idarnes incertus (Ashmead, 1900)	I_incertus_USNM_PLT	Female	0.266	0.683	0.764	1.713	0.516	0.376	0.496	0.38	0.147	0.151	0.148	0.066	0.165	0.075	0.041	0.06	0.215	0.148	1.466	0.142	0.143	0.027
Idarnes maximus Farache & Rasplus, sp. n.	15_02_M01	Female	0.37	1.01	1.49	2.87	1.522	0.551	0.71	0.559	0.214	0.175	0.21	0.097	0.188	0.082	0.084	0.094	0.309	0.274	1.913	0.198	0.161	0.072
Idarnes maximus Farache & Rasplus, sp. n.	201_05_M02	Male	0.43	1.2	1.4	3.03	X	0.6	0.71	0.6	0.215	0.16	0.223	0.122	0.28	0.12	0.045	0.05	0.28	0.23	2.12	0.2	0.158	0.056
Idarnes nigriventris Farache & Rasplus, sp. n.	2809_M01	Female	0.318	0.772	0.932	2.022	0.854	0.453	0.596	0.448	0.167	0.178	0.185	0.066	0.167	0.072	0.043	0.061	0.238	0.217	1.507	0.155	0.147	0.043
Idarnes nigriventris Farache & Rasplus, sp. n.	2809_M02	Male	0.35	0.88	0.92	2.15	X	0.42	0.59	0.46	0.185	0.16	0.165	0.07	0.226	0.096	0.039	0.052	0.218	0.19	1.64	0.16	0.14	0.04
Idarnes pseudoflavus Farache & Rasplus, sp. n.	2182_M01	Female	0.328	0.829	0.868	2.025	0.851	0.477	0.604	0.446	0.208	0.151	0.183	0.064	0.172	0.075	0.043	0.068	0.231	0.175	1.561	0.138	0.123	0.041
Idarnes pseudoflavus Farache & Rasplus, sp. n.	2182_M02	Male	0.3	0.85	0.86	2.01	X	0.45	0.52	0.44	0.21	0.1	0.13	0.06	0.195	0.085	0.026	0.04	0.235	0.174	1.58	0.161	0.148	0.045
Idarnes ramirezi Farache & Rasplus, sp. n.	2182_M01	Female	0.292	0.809	0.707	1.808	0.515	0.375	0.494	0.398	0.136	0.15	0.164	0.054	0.153	0.069	0.041	0.061	0.211	0.176	1.387	0.148	0.118	0.012
Idarnes ramirezi Farache & Rasplus, sp. n.	2182_M02	Male	0.25	0.68	0.85	1.78	X	0.36	0.46	0.39	0.165	0.122	0.13	0.061	0.169	0.096	0.036	0.05	0.209	0.156	1.41	0.148	0.122	0.024
